# Supplementary material
Source: publisher figshare collection journal article supplement (https://tandf.figshare.com/ndownloader/files/16832267)
Supplement: Supplementary file 1 [file 16832267]

## Supplementary Material for Network topology of deeply supercooled water

Authors: C. Shi<sup>1,2</sup>, O.L.G. Alderman<sup>3</sup> and C.J. Benmore<sup>2,\*</sup>

To investigate the origin of the small peak associated with large 18-membered rings, we ran EPSR simulations identical in every respect but varied the box size. The associated -O-H-O- ring distributions for five models containing 500, 1000, 1800, 2500 and 3000 molecules are shown in figure S3. Anomalous large peaks are observed for ring sizes of 13 for a box size of 500 molecules and 16 for a box containing 1000 molecules. The anomalous peak shifts to a ring size of 18 for a box of 1800 molecules, the same as observed by Soper<sup>9</sup>, but of higher intensity. For boxes of 2500 and 3000 molecules the anomalous peak disappeared. As a consequence the EPSR models reported in this paper were run using boxes containing 2500 molecules.

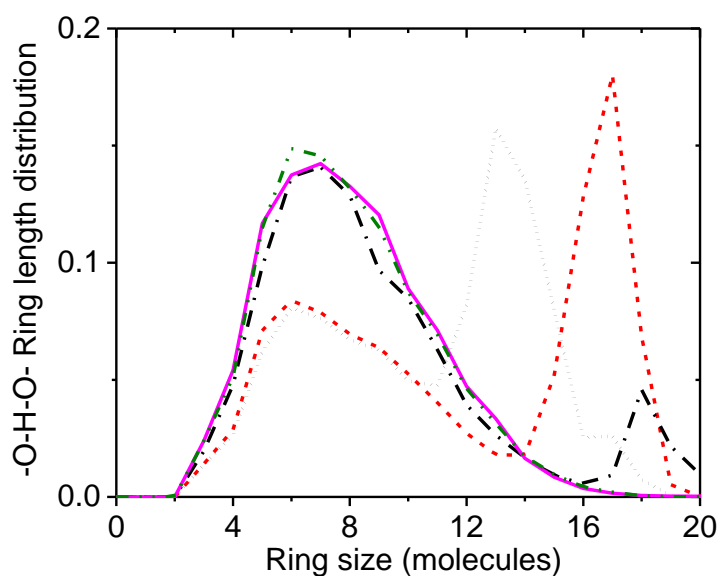

**Figure S1.** The box size dependence of ring distributions for -O-H-O- rings from the EPSR models at 293 K, using the cutoff  $r_{\text{O-H}} = 2.4 \text{ \AA}$ . The number of molecules in each box were 500 (black dotted line), 1000 (red dashed line), 1800 (black dash-dot line), 2500 (magenta solid line) and 3000 (green dash-dot-dot line).

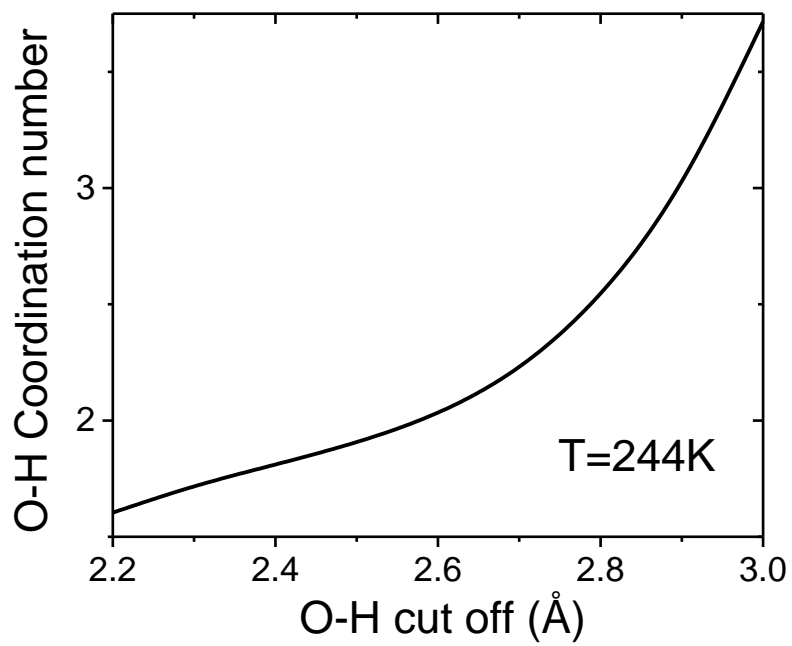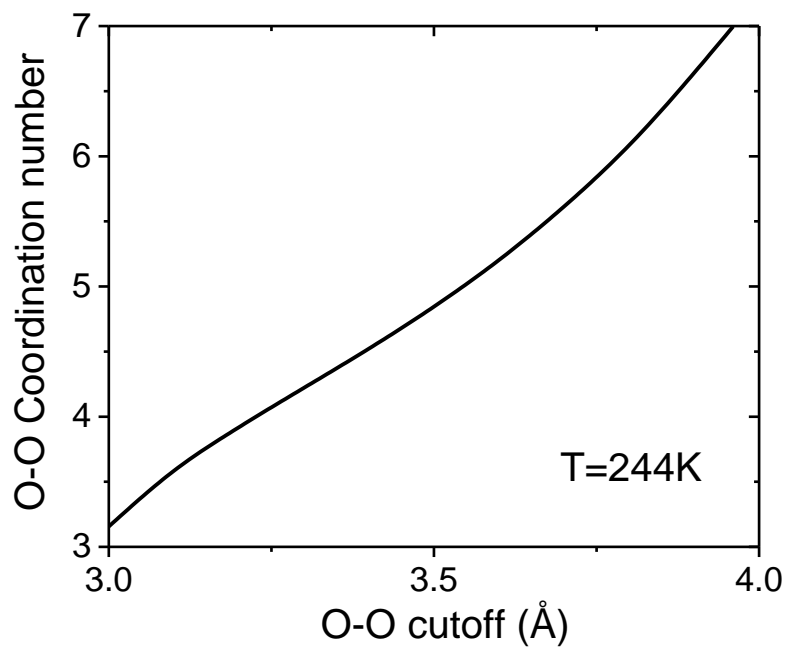

**Figure S2.** The (a) O-H and (b) O-O intermolecular coordination numbers from the EPSR model at 244 K as a function of cut-off distance.

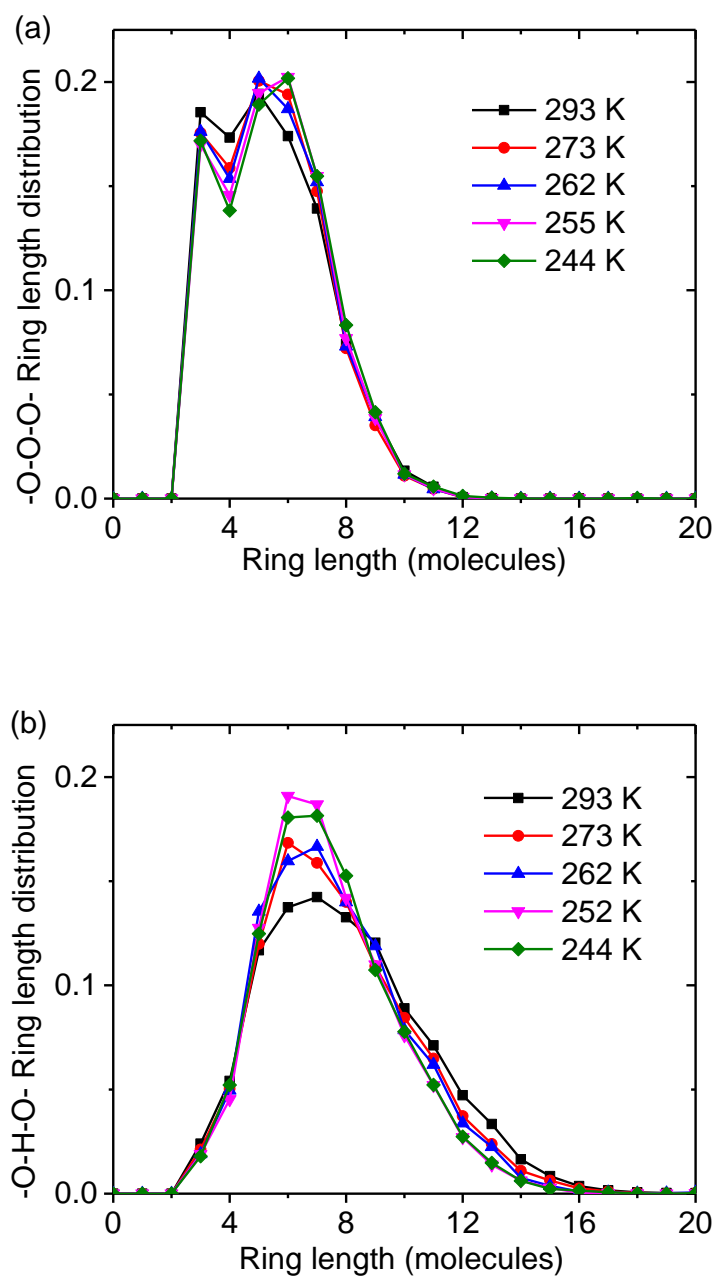

**Figure S3.** Temperature dependence of (a) the hydrogen bonded -O-O-O- distributions and (b) -O-H-O- ring distributions obtained from EPSR models. Shown here as continuous lines rather than a bar graph for clarity.
